# Supplementary material
Source: PubMed Central journal article supplement (PMC3942676)
Supplement: Supp_Data.pdf [file Supp_Data.pdf]

## Supplementary Data

### **Putative Model of Coupling of Mitochondrial Parameters Mediated via $\text{mitoCa}^{2+}$ Changes in Fus1 WT and Fus1 KO Cells**

Based on the literature data and our results, we propose the following model of coupling of mitochondrial parameters mediated *via*  $\text{mitoCa}^{2+}$  changes. Generally, after increase in intracellular  $\text{Ca}^{2+}$  levels,  $\text{mitoCa}^{2+}$  uptake induces the Krebs cycle leading to the elevation of  $\Delta\mu\text{H}^+$ , reactive oxygen species (ROS) production, and stimulation of the redox chain  $\text{NADH} \rightarrow \text{NADPH} \rightarrow \text{thiols}$ . Balanced reduction of thiols maintains low ROS levels and protects cells from the oxidative stress.

Because  $\Delta\mu\text{H}^+$  is a driving force behind  $\text{mitoCa}^{2+}$  uptake, depolarization will reduce the uptake thus limiting the damage induced by  $\text{mitoCa}^{2+}$  overload. Due to dependence of  $\text{Ca}^{2+}$  channels on redox environment,  $\text{mitoROS}$  changes could be transmitted into alterations in  $\text{Ca}^{2+}$  oscillations triggering changes in the NF- $\kappa\text{B}$  and NFAT transcriptional activities in T cells.

Excessive  $\text{mitoCa}^{2+}$  accumulation induced by  $\text{Ca}^{2+}$  overload leads to increased  $\Delta\mu\text{H}^+$  followed by enhanced ROS production. Since ROS levels are determined by the balance of oxidation/reduction reactions, elevation of ROS will be accompanied by fast thiol oxidation and mitochondrial permeability transition pore (mPTP) opening. On the other hand, significantly decreased uptake and/or increased egress of  $\text{mitoCa}^{2+}$  (e.g., in  $\text{Fus1}^{-/-}$  cells) will not feed Krebs cycle enough to produce sufficient number of thiol reducing equivalents and produce the effects similar to excessive  $\text{mitoCa}^{2+}$  uptake, therefore contributing to ROS accumulation,  $\Delta\mu\text{H}^+$  depolarization after redirection of reducing equivalents from  $\text{H}^+$  accumulation on inner mitochondrial membrane to transhydrogenase/glutathionreductase (TH/GR) reactions, excessive thiol oxidation, and opening of mitochondrial channels (e.g., IMAC, mPTP). In  $\text{Fus1}^{-/-}$  splenocytes,  $\text{Ca}^{2+}$  uptake results in improved transduction of  $\text{Ca}^{2+}$  into  $\Delta\mu\text{H}^+$  due to the loss of depolarizing effect of the reduction in  $\text{Ca}^{2+}$  accumulation. We propose that the decreased  $\text{mitoCa}^{2+}$  accumulation in  $\text{Fus1}^{-/-}$  cells results in the slower transformation  $\Delta\mu\text{H}^+ \rightarrow \text{ROS}$  because of the reduced thiols due to the Krebs cycle stimulation. As a result, it prevents  $\Delta\mu\text{H}^+$  from depolarization during coupled TH/GR reactions. All listed parameters ( $\Delta\mu\text{H}^+$ , ROS, mPTP,  $\text{mitoCa}^{2+}$  uptake) may affect global  $\text{Ca}^{2+}$  signaling and activation of transcription factors *via* the modulation of  $\text{Ca}^{2+}$  oscillations. In turn, alterations in transcription may affect cell differentiation (e.g., Th cell polarization), proliferation, and other vital cellular processes.

### *Flow cytometric analysis of $\text{cytoCa}^{2+}$ , $\text{mitoCa}^{2+}$ , MMP, $\text{mitoROS}$ , and mPTP*

Cytoplasmic calcium levels were measured by loading the cells with 1  $\mu\text{M}$  fluoro-3 acetoxymethyl ester (Fluo-3/AM) (excitation, 506 nm; emission, 526 nm; recorded in FL-1; Molecular Probes). Mitochondrial calcium level was estimated by loading the cells with 4  $\mu\text{M}$  Rhod2/AM, which is compartmentalized into the mitochondria (44). Production of

mitochondrial ROS (superoxide anion) was assessed fluorometrically using oxidation-sensitive fluorescent probes MitoSOX (Molecular Probes) as described elsewhere (41).  $\Delta\psi/\text{m}$  was quantitated using a potential-dependent J-aggregate-forming lipophilic cation JC-1, 5,5',6,6'-tetrachloro-1,1',3,3'-tetraethylbenzimidazolocarbocyanine iodide (Molecular Probes). JC-1 selectively incorporates into mitochondria, where it forms monomers (fluorescence in green, 527 nm) or aggregates, at high transmembrane potentials (fluorescence in red, 590 nm) (44). Cells were incubated with 0.5  $\mu\text{M}$  JC-1 for 15–45 min at 37°C before flow cytometry. Co-treatment with a protonophore, 5  $\mu\text{M}$  carbonyl cyanide *m*-chlorophenylhydrazone (Molecular Probes), for 15 min at 37°C resulted in decreased JC-1 fluorescence and served as a positive control for the disruption of  $\Delta\psi/\text{m}$  (44). mPTP permeability was monitored through a release of fluorescent calcein from mitochondria *via* mPTP. The fluorescence from cytosolic calcein was quenched by the addition of  $\text{CoCl}_2$ , whereas the fluorescence from the mitochondrial calcein was maintained. Production of nitric oxide (NO) was estimated with dye 4-amino-5-methylamino-2',7'-difluorofluorescein diacetate (DAF-FM; Molecular Probes). Inside the cell, DAF-FM is deacetylated and retained in the cell. Non-fluorescent DAF-FM after reaction with NO forms fluorescent benzotriazole. For NO level estimation, cells were incubated with 1–5  $\mu\text{M}$  DAF-FM for 1 h at 37°C. Excitation and emission maximum of DAF-FM are 495 and 515 nm, respectively (43). Oxidation of intracellular nonprotein thiols (primarily GSH) was measured using the Cell Tracker Green CMFDA (5-chloromethylfluorescein diacetate) probe, which has a chloromethyl group that, when reacting with thiols, gets converted into a fluorescent adduct. For GSH measurement, cells were incubated with 1  $\mu\text{M}$  CMFDA for 30–60 min at 37°C. Excitation and emission maximum of CMFDA are 492 and 517 nm, respectively (21).

### *Antibodies and reagents*

Conjugated mouse monoclonal antibodies, CD4-FITC, CD4-PE, IFN $\gamma$ -PE, IL-4-FITC, PD-1-FITC, and PD-L1-PE (Biolegend), were used for FACS. Mouse CD4<sup>+</sup> T-cell isolation kit II was purchased from Miltenyi Biotec. Probes for the measurement of cytosolic (Fluo-3) and mitochondrial  $\text{Ca}^{2+}$  (Rhod-2) were purchased from AnaSpec Inc. Probes for other mitochondrial parameters such as membrane potential (JC-1), ROS (MitoSOX), permeability transition pore assay, and mitochondrial morphology (MitoTracker Red) were all from Molecular Probes (Invitrogen). CGP37157, inhibitor of mitochondrial  $\text{Na}^+/\text{Ca}^{2+}$  exchanger (mNCX), was obtained from Sigma. Calcium Green-5N for the measurement of  $\text{Ca}^{2+}$  uptake by mitochondria in digitonin-permeabilized cells was purchased from Molecular Probes (Invitrogen).

### *Cell culture*

Mouse immortalized kidney epithelial cells were maintained in DMEM/10% FBS medium with 100  $\mu\text{g}/\text{ml}$  Anti-Anti mixture (all from Gibco, Inc) at 37°C and 5%  $\text{CO}_2$ .

SUPPLEMENTARY TABLE S1. LIST OF GENES UPREGULATED AT BASAL LEVEL IN CD4<sup>+</sup> T CELLS ISOLATED FROM *Fus1* KO MICE (mRNA ISOLATED FROM CD4<sup>+</sup> T CELLS OF FIVE MICE PER GROUP WAS POOLED FOR ANALYSIS)

| <i>Gene symbol</i> | <i>KO/WT fold change</i> |
|--------------------|--------------------------|
| Gnl2               | 3.309226408              |
| Acadl              | 3.233942438              |
| <b>Retnlg</b>      | 2.913616505              |
| <b>Mmp8</b>        | 2.911357488              |
| <b>S100a9</b>      | 2.815958358              |
| <b>S100a8</b>      | 2.738101638              |
| F630028O10Rik      | 2.608049045              |
| <b>Ltf</b>         | 2.605519406              |
| Igkv12-47          | 2.496804738              |
| Il1f9              | 2.487706007              |
| <b>Trdn (5)</b>    | 2.469390505              |
| Slc7a11            | 2.359272399              |
| <b>Mmp9</b>        | 2.323977337              |
| Wfikkn2            | 2.304386961              |
| <b>Gp49a</b>       | 2.213599158              |
| Slc15a2            | 2.203234415              |
| <b>Lilrb4</b>      | 2.188555545              |
| Ly6g               | 2.160803677              |
| <b>Hmox1</b>       | 2.156630474              |
| <b>Clec4d</b>      | 2.112152496              |
| <b>Lcn2</b>        | 2.091046291              |
| Cybb               | 2.067724534              |
| Lyn                | 2.0580471                |
| Zdhc20             | 2.029025505              |
| <b>Nup210l</b>     | 2.003399307              |
| <b>Adam4</b>       | 1.988233227              |
| Mir701             | 1.985882136              |
| Gdap10             | 1.981983566              |
| <b>Cd63</b>        | 1.979451885              |
| Mir140             | 1.978360033              |
| Igk-V28            | 1.968426713              |
| Hspa1a (3)         | 1.945893834              |
| Gm5887             | 1.925593264              |
| Olf1r60            | 1.912786695              |
| Mir505             | 1.900689671              |
| Fam129a            | 1.892789532              |
| Gpr21              | 1.892420901              |
| <b>Fam38a (2)</b>  | 1.892308096              |
| <b>Plxnc1</b>      | 1.885165259              |
| <b>Spf2 (8)</b>    | 1.873859779              |
| Pten               | 1.85771862               |
| Gm6683             | 1.856598683              |
| Il1rl1             | 1.847727492              |
| Lyz2               | 1.835585099              |
| Mir340             | 1.835109309              |
| Thbs1              | 1.815598246              |
| <b>Sestd1</b>      | 1.811648415              |
| Mir342             | 1.806319377              |
| Eid3               | 1.790513008              |
| Plek               | 1.774862177              |
| Atp6v0a1           | 1.76989405               |
| Gm10008            | 1.766243192              |
| Gpr52              | 1.761727758              |
| Dock6              | 1.753191999              |
| Slc5a3             | 1.745479                 |
| Cspp1              | 1.745376164              |
| BC018473           | 1.745083416              |
| U29423             | 1.744086991              |

(continued)

SUPPLEMENTARY TABLE S1. (CONTINUED)

| <i>Gene symbol</i> | <i>KO/WT fold change</i> |
|--------------------|--------------------------|
| <b>Adam8</b>       | 1.741591172              |
| Ube2v1             | 1.736494691              |
| 9430025M13Rik      | 1.733589115              |
| Irf4               | 1.732515188              |
| Csf2rb             | 1.730731587              |
| Tanc2              | 1.722102482              |
| Csf3r              | 1.720947397              |
| Itgae              | 1.719522508              |
| Mir29b-1           | 1.719310366              |
| Phxr4              | 1.718917138              |
| <b>Clec4n</b>      | 1.715120571              |
| Tbrg3              | 1.709054022              |
| Map3k12            | 1.696129119              |
| Ctsw               | 1.694390024              |
| Rnf213 (8)         | 1.691076588              |
| Arhgap20           | 1.681693746              |
| Notch2             | 1.677314241              |
| Gm15800 (2)        | 1.675823256              |
| Hmgb3 (2)          | 1.675316878              |
| Nrp1               | 1.675093934              |
| Snord118 (2)       | 1.670202466              |
| 1700031F05Rik      | 1.669317063              |
| 9530009G21Rik      | 1.663618923              |
| Alox5ap            | 1.654945835              |
| Csf2rb2            | 1.654781805              |
| Nlrc5 (8)          | 1.651646567              |
| Mir148b            | 1.651455391              |
| Ddx60              | 1.650987274              |
| Tlr13              | 1.645923177              |
| Ptprj (2 probes)   | 1.644058916              |
| Plac8              | 1.6421353                |
| Tyrobp             | 1.63800073               |
| MGC7817            | 1.63687369               |
| Dnajb6             | 1.634680855              |
| Chi3l3             | 1.634206165              |
| Cd33               | 1.629765052              |
| Gm5571             | 1.628473226              |
| Ptprj              | 1.627227538              |
| Szt2 (5)           | 1.624706363              |
| Myo1f              | 1.623997037              |
| Nup210l            | 1.623292521              |
| Cd24a              | 1.621379716              |
| Gm4787             | 1.616973461              |
| C530030P08Rik (2)  | 1.614077666              |
| Phgdh              | 1.608905956              |
| Gm9982             | 1.607796706              |
| Ms4a1/CD20         | 1.601129502              |
| Mir16-2            | 1.600630161              |
| Ccr9               | 1.600133195              |
| Fam196b            | 1.600098812              |
| Ermp1              | 1.600006759              |
| Il2rb              | 1.59643078               |
| Slc22a15           | 1.596132036              |
| Ebf1               | 1.594239081              |
| Mir181a-1          | 1.593800439              |
| Pglyrp1            | 1.592379275              |
| Tiaf2              | 1.590345254              |
| Mir15a             | 1.589690597              |
| Igsf6              | 1.589515407              |
| Myo9a (4)          | 1.585628721              |
| Gm10551            | 1.584336737              |
| Gm10388            | 1.582688131              |

(continued)

SUPPLEMENTARY TABLE S1. (CONTINUED)

| <i>Gene symbol</i> | <i>KO/WT fold change</i> |
|--------------------|--------------------------|
| Cd74               | 1.581548721              |
| Mir421             | 1.579363222              |
| Snord53            | 1.578831272              |
| <b>Plcg2</b>       | 1.577008023              |
| I830127L07Rik      | 1.576884508              |
| Il23r              | 1.572251487              |
| Plxdc2             | 1.57146049               |
| Gtf3c2             | 1.569655545              |
| Igf1r              | 1.568950678              |
| Cd19               | 1.565847811              |
| Atp6v0d2           | 1.563643906              |
| Lrrc6              | 1.561713704              |
| <b>Anxa2</b>       | 1.560476899              |
| D130062J21Rik      | 1.560400104              |
| Clic4              | 1.559301599              |
| Lrrk2              | 1.558559249              |
| 1700081L11Rik      | 1.557594829              |
| Adam19             | 1.556395808              |
| Wnk1               | 1.548084263              |
| Ikzf2              | 1.547457728              |
| Cdk13              | 1.547272177              |
| Foxp3              | 1.547039465              |
| Ern1               | 1.54637155               |
| Htt                | 1.546251506              |
| 4932438A13Rik      | 1.543946755              |
| Rangrf (2)         | 1.543626803              |
| Tet3 (2)           | 1.543034159              |
| Gnrh1              | 1.542832027              |
| Kcnip2             | 1.541432805              |
| Snord85            | 1.539856594              |
| Ptpn3              | 1.539430782              |
| Dennd4a (2)        | 1.535551608              |
| Raph1              | 1.534081362              |
| Diap2              | 1.532536038              |
| Gm340              | 1.53231935               |
| 1300014I06Rik      | 1.529835997              |
| Mll2 (2)           | 1.526301526              |
| Cpd                | 1.524853878              |
| Hipk2              | 1.520921824              |
| Mll1               | 1.51834538               |
| LOC630837          | 1.516613006              |
| Fscn1              | 1.51533209               |
| Pilra              | 1.515311083              |
| Mcpt8              | 1.514646368              |
| Arrdc4             | 1.510313453              |
| Mir19b-1           | 1.509836156              |
| Arhgap26           | 1.509254393              |
| <b>Plbd1</b>       | 1.507180286              |
| Tnfrsf1b           | 1.506103588              |
| Cdk6               | 1.503428231              |
| Nup210l            | 1.499262499              |
| 5430427O19Rik      | 1.499071296              |
| Spib               | 1.496298489              |
| Ncf1               | 1.495406802              |
| Bcl2a1c            | 1.495382961              |
| Pou2f2             | 1.495218164              |
| Atrn1l             | 1.494269117              |
| Mir30e             | 1.49148038               |
| Endod1             | 1.491130992              |
| Tmem176b           | 1.488837192              |
| Vav2               | 1.487904571              |
| <b>Cacnb3</b>      | 1.48498669               |

(continued)

SUPPLEMENTARY TABLE S1. (CONTINUED)

| <i>Gene symbol</i> | <i>KO/WT fold change</i> |
|--------------------|--------------------------|
| Cxcr2              | 1.484834359              |
| <b>Nfat5</b>       | 1.481434664              |
| Gm9766             | 1.48114204               |
| ND6                | 1.481112267              |
| Rora               | 1.480894638              |
| H2-Aa              | 1.477826598              |
| 4932438A13Rik      | 1.47673402               |
| Gabarapl2          | 1.476380922              |
| Olfir798           | 1.475314977              |
| Nt5e               | 1.475164661              |
| Bglap              | 1.474376519              |
| Cep350             | 1.472246251              |
| Tiam1              | 1.466200091              |
| Cd93               | 1.464405401              |
| Abcc1              | 1.464125275              |
| H2-Eb1             | 1.462254065              |
| Kcnrg              | 1.461125398              |
| Eif2c2             | 1.459505857              |
| BC049807           | 1.459447182              |
| Hells              | 1.459411776              |
| B230325K18Rik      | 1.459405706              |
| Iigp1              | 1.459380417              |
| Gent1              | 1.459379406              |
| St6galnac3         | 1.459180141              |
| Ctsh               | 1.459108331              |
| LOC100046275       | 1.458807983              |
| Tsc22d1            | 1.458530949              |
| Neil2              | 1.457548611              |
| Rnf157             | 1.457538508              |
| Nbeal1             | 1.457105159              |
| Cd180              | 1.456393291              |
| <b>Anxa4</b>       | 1.454948411              |
| Gm5415             | 1.454752777              |
| Swap70             | 1.45262569               |
| Gm16970            | 1.451414914              |
| Ikzf4              | 1.449870453              |
| Olfir776           | 1.449856383              |
| Slamf7             | 1.449504689              |
| Cyfp1              | 1.448632854              |

Numbers within parentheses indicate when genes are represented by multiple probes. Proteins implicated in Ca<sup>2+</sup>-binding or Ca<sup>2+</sup>-dependent activities are shown in bold.

KO, knockout; WT, wild type.

#### *Splenocyte isolation, CD4<sup>+</sup> T-cell purification and activation*

CD4<sup>+</sup> cells were purified from the whole splenocyte fraction using CD4<sup>+</sup> isolation kit II (Miltenyi Biotec). CD4<sup>+</sup> cells were activated, unless otherwise indicated, with plate-bound  $\alpha$ -CD3 (1.0  $\mu$ g/ml) and soluble  $\alpha$ -CD28 (1.0  $\mu$ g/ml; both from Biolegend) and cultured at a density of  $\sim 1 \times 10^6$  cells/ml in 24-well plates in RPMI-1640 medium supplemented with Anti-Anti mixture and 10% FBS).

#### *Mitochondrial morphology imaging*

Epithelial cells at  $\sim 70\%$ – $80\%$  confluency were treated with Ca<sup>2+</sup> and Ca<sup>2+</sup>/ionomycin for 15 mins and with Mito-tracker Red. Cells were then washed and fixed in 3.7% formaldehyde for 15 mins in the dark, permeabilized, and mounted with DAPI-containing mounting media. Zeiss LSM

SUPPLEMENTARY TABLE S2. LIST OF GENES  
(LEFT COLUMN) ACTIVATED BY CD3/CD28  
STIMULATION OF CD4<sup>+</sup> T CELLS FOR 12 H

| #. Gene name     | Activation index |           |
|------------------|------------------|-----------|
|                  | WT               | KO        |
| 1. Irf4          | 12.3231314       | 7.5318747 |
| 2. Itih5         | 6.82112641       | 4.4342527 |
| 3. Cd69          | 5.43508651       | 3.884853  |
| 4. Il2           | 4.97878253       | 3.4403814 |
| 5 Ccl22          | 4.36408439       | 3.5432228 |
| 6. Socs2         | 4.33369013       | 3.0510842 |
| 7. Gbp5          | 3.91431538       | 2.5991286 |
| 8. Tnf           | 3.49319456       | 2.6839113 |
| 9. Gpr83         | 3.3371904        | 2.3182899 |
| 10. Iigp1        | 3.21244777       | 1.824061  |
| 11. Nfkbid       | 2.86361988       | 2.1490395 |
| 12. Clic4        | 2.75261912       | 2.039259  |
| 13. Beat1        | 2.66750135       | 1.8072599 |
| 14. Gm12250      | 2.59756527       | 1.5286806 |
| 15. Gm129        | 2.56008374       | 1.7132765 |
| 16. Gbp2         | 2.53934779       | 1.741293  |
| 17.E430024C06Rik | 2.4293915        | 1.7021427 |
| 18. Cd83         | 2.42835274       | 1.9056366 |
| 19. Bcl2a1c      | 2.3530272        | 1.5129623 |
| 20. Fcer2a       | 2.34646835       | 1.1004488 |
| 21. Rrs1         | 2.30439495       | 1.5762889 |
| 22. Tgtp1 (2)    | 2.25670838       | 1.4218507 |
| 23. Myb          | 2.17504462       | 1.560054  |
| 24. Gbp1         | 2.1727437        | 1.6590588 |
| 25. Irgm1        | 2.15698329       | 1.408188  |
| 26. Bcl2a1a      | 2.14358853       | 1.6992275 |
| 27. Irgm2        | 2.11152306       | 1.5346599 |
| 28. Gbp3         | 2.0939892        | 1.6267979 |
| 29. Odc1         | 2.06805564       | 1.6446094 |
| 30. Cd200        | 2.05993241       | 1.5080163 |
| 31. Rgs1         | 2.03068434       | 1.5311366 |
| 32. Pim2         | 1.9926385        | 1.3690261 |
| 33. Rgs16        | 1.98996768       | 1.5624045 |
| 34. Mpa21        | 1.96120453       | 1.4460025 |
| 35. Serpinb9     | 1.94931738       | 1.2539241 |
| 36. Stat1        | 1.94603816       | 1.3548283 |
| 37. Ccr8         | 1.92169982       | 2.4724168 |
| 38. Cth          | 1.92101529       | 1.534994  |
| 39. Gas5         | 1.9026326        | 0.8414182 |
| 40.Nop58         | 1.90125494       | 1.4965381 |
| 41.Rnf213        | 1.89197234       | 1.0120356 |
| 42. Apex1        | 1.88733562       | 1.1718371 |
| 43. Ttc27        | 1.86722269       | 1.4652786 |
| 44. Hspd1        | 1.86482468       | 1.5459568 |
| 45. Gm4759       | 1.8556672        | 1.0056728 |
| 46. Gnl3         | 1.85325191       | 1.4933465 |
| 47. Ebi3         | 1.84830648       | 1.3738971 |
| 48. Swap70       | 1.83020722       | 1.1431463 |
| 49. Dnahc7b      | 1.82472114       | 1.4806945 |
| 50. Lilrb4       | 1.82399655       | 1.2254096 |
| 51. Gvin1        | 1.82268721       | 1.3510396 |
| 52. Gpt2         | 1.80460114       | 1.1846509 |
| 53. Gp49a        | 1.80054418       | 1.2338004 |
| 54. Gm5772       | 1.79634817       | 1.250045  |
| 55. Gm13235      | 1.78177479       | 0.6577367 |
| 56. Tsen15       | 1.78106232       | 1.3933995 |
| 57. Nlrc5        | 1.77719994       | 1.0263452 |
| 58. Ecm1         | 1.77396679       | 1.4163129 |
| 59. Snord1c      | 1.77325006       | 1.1835052 |
| 60. Rrp15        | 1.77150557       | 1.3168628 |

SUPPLEMENTARY TABLE S2. (CONTINUED)

| #. Gene name     | Activation index |           |
|------------------|------------------|-----------|
|                  | WT               | KO        |
| 61. Apol7c       | 1.74540278       | 1.0197539 |
| 62. Rtp4         | 1.73695575       | 1.1549401 |
| 63. Fscn1        | 1.73445571       | 1.0413529 |
| 64. Gbp4         | 1.73056125       | 1.3432613 |
| 65. Snhg1        | 1.66413561       | 1.0402895 |
| 66. Shmt1        | 1.66260793       | 1.2436952 |
| 67. Nup210l      | 1.66105633       | 0.9412344 |
| 68. Zfp640       | 1.64673796       | 1.1902792 |
| 69. Mrpl42       | 1.62451267       | 1.1938197 |
| 70. Gm8995       | 1.62229929       | 1.2399999 |
| 71. Gbp6         | 1.62041124       | 1.2723715 |
| 72. Ms4a4c       | 1.61439096       | 1.2347115 |
| 73. Il2rb        | 1.60515209       | 1.1176202 |
| 74. Zfp600       | 1.60413438       | 1.068329  |
| 75. Mrps36       | 1.59112921       | 1.1779963 |
| 76.2810021G02Rik | 1.59014685       | 0.8284864 |
| 77.1810029B16Rik | 1.58788342       | 1.2941824 |
| 78. Snord38a     | 1.58652032       | 1.0149756 |
| 79. Atp13a3      | 1.58334868       | 0.8990199 |
| 80. Zfp455       | 1.58070922       | 0.955783  |
| 81. Akr1c18      | 1.57804572       | 1.0165795 |
| 82. Dkc1         | 1.57621791       | 1.1843726 |
| 83. Gm5921       | 1.57587161       | 1.2149189 |
| 84. Pus7         | 1.57198015       | 1.0921023 |
| 85. Cmpk1        | 1.57002116       | 0.9486403 |
| 86. Irf9         | 1.56850486       | 1.0862303 |
| 87. Chchd4       | 1.56580223       | 1.1182037 |
| 88. Dleu2        | 1.56456218       | 1.2228742 |
| 89. Samsn1       | 1.55176598       | 1.2096117 |
| 90. Trdn         | 1.54395104       | 1.0980015 |
| 91. St6galnac4   | 1.53248824       | 1.270867  |
| 92. Nudt11       | 1.52517522       | 0.8827299 |
| 93.2610044O15Rik | 1.52402651       | 1.0611135 |
| 94. Tnip3        | 1.52258102       | 1.1098056 |
| 95. Anp32-ps     | 1.52207875       | 0.9594782 |
| 96. Chd7         | 1.51762989       | 1.1702656 |
| 97. Gm8639       | 1.51541297       | 1.1077712 |
| 98. Ltn1         | 1.51384448       | 1.0685067 |
| 99. Dip2c        | 1.51088096       | 0.9273855 |
| 100. St13        | 1.51031659       | 1.1261352 |
| 101. Ipo7        | 1.50496402       | 1.0958649 |
| 102. Dnajc13     | 1.49571157       | 0.9562309 |
| 103. Gesh        | 1.48657989       | 1.1327371 |
| 104. Ewsr1       | 1.48511639       | 0.9691541 |
| 105. Rpl2211     | 1.48209816       | 1.0958862 |
| 106. Sft2d3      | 1.4812714        | 1.0461836 |
| 107. H2-T24      | 1.47696946       | 1.0999165 |
| 108. Slc7a11     | 1.4699866        | 1.1291374 |
| 109. Olfr800     | 1.4679227        | 1.1890208 |
| 110. Utp18       | 1.46726047       | 1.1459777 |
| 111. Idi1        | 1.46641759       | 1.0678056 |
| 112. Olfr798     | 1.46236455       | 0.7831464 |
| 113. Eif2b3      | 1.45793965       | 1.1478531 |
| 114. Naa15       | 1.45494034       | 1.2112528 |
| 115. Snord58b    | 1.45452491       | 1.010018  |
| 116. Id3         | 1.45199753       | 1.1335154 |
| 117. Nampt       | 1.45183852       | 1.1519379 |
| 118. Nol11       | 1.45159702       | 1.1383151 |
| 119. E2f5        | 1.4501187        | 0.9939554 |

Right columns present activation indices (expression level after stimulation/basal expression level) for these genes in *Fus1* WT and *Fus1* KO CD4<sup>+</sup> T cells.

(continued)



510 META Upright Confocal Microscope was used for analyzing mitochondrial morphology and making images.

#### *Measurement of mitochondrial Ca<sup>2+</sup> uptake capacity of digitonin-permeabilized cells*

Extramitochondrial free Ca<sup>2+</sup> was monitored in the presence of digitonin-permeabilized cells as described in (42, 48). Briefly, cells ( $2 \times 10^6$  cells/ml) were resuspended in KCl medium (125 mM KCl, 2 mM K<sub>2</sub>HPO<sub>4</sub>, 1 mM MgCl<sub>2</sub>, 20 mM Hepes, pH 7.0) containing 5 mM glutamate, 5 mM malate, and 5 mM succinate as oxidable substrates and 0.5  $\mu$ M Ca<sup>2+</sup> green-5N. The plasma membranes were then selectively permeabilized with digitonin (0.01%wt/vol final). Fluorescence (Ex506/Em531 nm) was monitored at room temperature using a SynergyMX (BioTek) fluorescence spectrophotometer. The involvement of mNCX in the Ca<sup>2+</sup> homeostasis was measured by the replacement of Na-containing buffer with Na-free buffer or by the addition of benzodiazepine CGP37157 (10–20  $\mu$ M), a blocker of mNCX, to challenged cells.

#### *CD4<sup>+</sup> T-cell proliferation assay*

Proliferation of CD4<sup>+</sup> T cells was measured by flow cytometry after a CFSE dilution assay as described elsewhere (36). Splenocytes were stained with CFSE (1  $\mu$ M), stimulated with CD3/CD28 (1  $\mu$ g/ml of each) or left unstimulated, harvested after 1, 2, and 3 days, stained for a surface CD4 expression with anti-mouse CD4 antibodies labeled with PerCP-Cy5.5 (Biolegend), and acquired on FACS Calibur flow cytometer (Beckman Coulter).

#### *Intracellular cytokine staining*

Cytokine staining and analysis was performed as described elsewhere (54). The antibodies used were anti-mouse IFN $\gamma$ -FITC (1/100  $\mu$ l permeabilization buffer) and  $\alpha$ -IL4-PE (1/100  $\mu$ l permeabilization buffer) (Biolegend).

#### *Apoptosis T-cell assays*

Apoptosis was monitored by flow cytometry after concurrent staining with FITC-conjugated Annexin V (Annexin V-FITC; R&D Systems) (FL-1) and 7-AAD (FL-3) as described elsewhere (44, 44). Apoptosis rates were expressed as a shift in Annexin V binding in PI-negative cells.

#### *CD4<sup>+</sup> T cells RNA isolation and microarray analysis*

RNA from unstimulated and stimulated for 12 h with CD3/CD28 antibodies CD4<sup>+</sup> T cells collected from five animals per group was isolated with the RNeasy mini RNA isolation kit (Qiagen), mixed together to obtain sufficient for hybridization RNA amount, and subjected to differential expression analysis using gene 1.0 microarray platform, which was performed in the Genomic Core Facility at the Vanderbilt University.

#### *Statistical analysis*

Results are presented as mean  $\pm$  SE. Comparisons between the two groups were performed using the Student's *t*-test. When analyzing statistical differences between the KO and WT mice,  $p < 0.05$  was considered significant.
